# Supplementary material for: Global untargeted serum metabolomic analyses nominate metabolic pathways responsive to loss of expression of the orphan metallo β-lactamase, MBLAC1
Source: Royal Society of Chemistry journal article supplement (doi:10.1039/c7mo00022g), 2018-05-28
Supplement: c7mo00022g2.xlsx [file c7mo00022g2.xlsx]

## Sheet: Supp_Table_1_POS HILIC UPLC
	Supplementary Table 1: HILIC-POS
	Putative identification	Mass to charge ratio (m/z)	Retention time (min)	ANOVA nominal Pvalue	Storey method pFDR q-value	Fold Change (relative to KO)	Coefficient of Variance (% min CV)	Maximum Abundance
		72.0808	24.3304	0.000800511	0.021715	1.50967	2.65	1527.97
		84.9113	15.5174	0.0207648	0.155571	1.29697	6.27	59760.4
		86.0601	3.09872	0.00561581	0.0736295	1.64843	8.15	25196.5
	Piperidine	86.0964	7.8332	0.0163237	0.137906	1.28494	6.99	97875.8
		86.9087	15.5174	0.0177944	0.14284	1.28592	5.12	26318.1
		90.055	25.9629	0.00812785	0.0906937	1.30953	4.79	285.798
		90.055	25.7472	0.0256559	0.174033	1.30406	4.63	120.046
		102.034	21.4942	0.00100539	0.023262	3.62456	2.05	15575.8
		102.034	20.1411	0.000572386	0.0187615	3.92672	3.34	46155.7
		102.066	6.06643	0.0458167	0.230303	1.31234	3.09	36995.2
		102.091	17.7501	0.0382465	0.211138	-1.21372	3.33	41998.6
		103.548	6.09708	0.0388244	0.212096	-2.32488	17.78	19545.5
		110.071	14.2781	0.00301309	0.0520944	-2.2716	9	52273.9
		112.05	22.4858	0.018544	0.145154	-1.44084	5.01	848.994
	Uracil	113.035	4.83258	0.0119148	0.112013	1.57634	5.5	35935.4
		113.051	6.09708	0.0430254	0.22341	-2.44832	18.89	44568.3
		118.065	17.1449	0.00928713	0.0974435	-2.00162	12.46	230.551
		118.123	20.9556	0.0259903	0.174033	-3.20383	7.79	60.5905
	Phenylethanolamine	120.081	21.864	0.00450677	0.0656355	-3.72202	20.93	157.882
		121.072	6.07082	0.0103758	0.103608	2.06759	18.99	11538.6
		122.081	10.2071	0.0302112	0.18862	-1.31352	5.83	8582.62
		122.554	6.08395	0.0217626	0.162274	-2.72608	4.75	73452.6
		125.986	9.27873	0.00035248	0.0158448	2.96787	5.14	1.11514e+06
		128.107	2.45022	0.000533212	0.018063	443.918	1.88	457443
	Pyroglutamic acid	130.05	12.6417	0.00978316	0.101157	-1.65317	7.09	19733.1
	Isoquinoline	130.065	8.59998	0.0308423	0.189552	-1.45768	9.18	11636.5
		131.053	25.4295	0.0111827	0.108605	8.54936	18.64	3.57372
	Isoleucine	132.102	7.82882	0.0202721	0.15334	1.24945	7.02	1.2172e+06
	Beta-Leucine	132.102	6.98325	0.00439556	0.0656355	1.80261	3.81	57713.3
	Asparagine	133.061	11.58	0.0201029	0.153216	-1.90344	14.2	155043
	Ornithine	133.097	18.0221	0.0093521	0.0974435	-1.36209	3.41	134477
		133.105	22.1486	0.0411455	0.219443	-4.46193	36.36	57.0306
		133.105	7.8332	0.0223314	0.162882	1.24311	6.81	84064.7
	Aspartic acid	134.045	12.1474	0.0286004	0.182178	1.5079	4.71	18705.6
	2-Oxindole	134.06	5.99145	0.00838139	0.0918869	6.4142	16.41	35651.5
	3-hydroxynorvaline	134.081	3.68655	0.0259732	0.174033	1.26756	8.25	47303.4
		134.118	22.3807	0.000748287	0.0214055	-1.64676	4.82	351.566
		136.048	20.1937	0.0245656	0.174033	-1.90744	1.91	359.486
		136.048	21.5073	0.0280119	0.181319	-2.69211	6.47	252.737
		137.046	21.8903	0.00081783	0.0218088	-3.3856	11.94	346.728
	6-Methylnicotinamide	137.071	9.41448	0.000963994	0.023262	2.87548	13.44	113229
		138.055	21.991	0.025057	0.174033	-1.77699	8.95	113229
		138.055	23.2658	0.0206339	0.155331	-1.71316	14.47	499.371
		138.055	6.21577	0.0422983	0.222037	2.29697	12.41	359.712
	Trigonelline	138.055	7.95627	0.0314225	0.191264	2.26029	7.51	11230.4
	Urocanic acid	139.05	23.8801	0.0282774	0.181319	-1.3562	9.11	560.055
		139.05	22.5384	0.00756692	0.0876159	-1.67836	6.61	1509.94
		139.05	19.8774	0.00581142	0.0755645	-1.76912	9.07	2096.38
		139.05	18.5301	0.00757358	0.0876159	-1.86288	11.28	2999.52
		139.058	7.9519	0.0318967	0.191543	2.3045	8.23	60694.8
		140.071	7.28103	0.000215822	0.0113187	3.47667	2.34	27609.6
		141.066	9.23057	0.00690737	0.0855716	2.95509	1.21	66428.1
		142.939	14.4883	0.000467001	0.017494	-1.87726	6.26	28638.5
		143.997	22.0391	0.000388503	0.0162335	3.12701	2.22	844610
		144.066	12.6417	0.0333133	0.197041	-1.54106	4.86	212221
		145.105	22.3588	0.0102348	0.103222	-5.88157	10.87	33.5617
		145.105	20.9819	0.00126669	0.0280693	-6.67235	20.13	62.7757
	4-Indolecarbaldehyde	146.06	8.59562	0.00930414	0.0974435	-1.65769	6.52	22938.8
		146.092	26.1775	0.0252596	0.174033	1.8395	10.04	54.2462
		146.118	8.95032	0.00514807	0.069964	1.63835	3.26	10597.2
		147.076	12.6636	0.00852679	0.0918869	-1.71449	4.98	65514.6
		148.06	27.2481	0.0454673	0.229766	-1.42315	7.1	86.2407
		148.097	8.346	0.00318787	0.053931	1.82506	3.33	13933
		149.019	20.3294	0.000912518	0.0230975	-251.676	15.34	276.868
	Methionine	150.058	3.09872	0.00348707	0.0583652	1.75779	9.44	133816
		151.035	21.3059	0.0041143	0.0641595	-2.31911	12.49	2.803e+06
		151.039	10.1808	0.0448067	0.228883	1.61203	17.22	16717.5
		153.066	3.54148	0.0253684	0.174033	1.68732	7.48	1.21014e+06
		154.069	3.54148	0.0260214	0.174033	1.70986	8.15	92614
	Histidine	156.077	14.2694	0.00247434	0.0463448	-2.40302	8.34	1.75418e+06
	Histidine	156.077	12.9139	0.0106707	0.105588	-1.92075	15.01	656944
	Histidine	156.077	17.5875	0.000199737	0.0112233	-2.4286	7.34	118857
		156.984	10.3647	0.000489576	0.017506	3.26225	10.6	113178
	4,4'-Bipyridine	157.076	8.58685	0.00906651	0.0963827	-1.45194	2.99	47635.1
		157.08	14.2694	0.00232749	0.0452089	-2.33414	7.36	127742
		158.981	10.3472	0.000539594	0.018063	3.42136	8.69	31546.9
		159.028	20.4827	2.19536e-06	0.000869267	-2.22275	2.37	233.262
	Hydroxymethyl-5,5-dimethylhydantoin	159.076	11.7825	0.0168779	0.140838	-1.63808	11.07	432815
		159.092	22.5909	0.0130657	0.118142	-1.88243	7.51	229.411
	1,5-Naphthalenediamine	159.092	8.59562	0.0119821	0.112013	-1.40349	5.1	164181
		159.121	21.9165	0.0273746	0.178711	-2.03655	20.96	210.252
		159.121	20.5089	0.00662968	0.0827834	-2.93714	20.97	134.495
	Trigonelline	160.037	7.99568	0.0179971	0.143007	2.2066	20.85	204796
		160.08	11.7825	0.0183851	0.14501	-1.72352	13.72	29276.8
		160.095	8.58685	0.0225479	0.163481	-1.33215	4.22	20297
		160.097	8.75763	0.00699691	0.0860037	-1.39605	5.99	54350.7
		160.097	3.0812	0.00728841	0.0871034	1.83848	10.03	100949
	Acetyl-β-methylcholine	160.133	9.0773	0.000430602	0.0173713	2.49294	7.01	7.40429e+06
	N. epsilon-methyl-l-lysine	161.129	16.5788	0.0405915	0.217966	1.28643	1.71	187535
		161.137	9.07292	0.000459733	0.017494	2.4906	7.18	674108
		162.112	23.4366	0.0132291	0.118936	-1.39233	6.44	1053.67
	7-Methylguanine	166.072	6.36467	0.00777552	0.0886484	1.33952	3.9	13446.5
		166.086	21.8596	0.0372553	0.20712	-1.41869	8.83	4186.61
		167.013	9.36193	0.00520283	0.069964	2.68504	6.59	1.23996e+07
		167.09	23.1598	0.013662	0.12213	-1.72853	14.98	197.717
		168.066	3.41888	0.0407951	0.218314	1.39626	3.02	118122
		168.961	10.3472	0.000239915	0.0117958	4.07866	13.62	39181.4
	3-Methylhistidine	170.092	11.0283	0.0258562	0.174033	-1.45751	11.78	185237
		171.113	6.05768	0.0287275	0.18225	-1.42041	11.91	95477.5
		171.113	10.2071	0.0248127	0.174033	-1.34278	3.26	5933.13
	Citrulline	176.103	11.7825	0.0146121	0.128435	-1.67691	12.54	1.7136e+06
		176.128	8.057	0.00403395	0.0641595	-1.726	4.73	62089
		176.128	9.90493	0.000706801	0.0213913	2.68909	3.76	24988.2
		177.106	11.7825	0.0156174	0.133876	-1.6964	12.99	113904
		178.09	2.56845	0.0201583	0.153216	2.50595	3.31	38704.2
		180.099	21.9691	7.92324e-05	0.00830861	-4.02209	2.47	173.089
		180.099	20.5659	0.000199003	0.0112233	-2.77539	2.17	160.038
		181.026	17.7944	0.00037821	0.0162335	3.97078	2.1	1802.64
		185.023	9.17802	0.00039208	0.0162335	3.15229	10.68	26646.4
		185.023	8.72698	0.00740983	0.0871902	2.77517	7.97	7579.71
		186.019	21.503	0.00317524	0.053931	5.10924	29.07	171.616
		188.071	22.5909	0.0026068	0.0482513	-4.17393	12.35	1894.06
		188.071	23.9601	0.00485616	0.0682175	-1.48901	5.61	5168.91
	Trans-3-Indoleacrylic acid	188.071	8.59562	0.014878	0.130045	-1.5147	9.36	502369
		188.128	8.2628	0.00163443	0.0333961	1.6481	4.28	52867.8
		189.074	8.59562	0.0117749	0.112013	-1.48125	5.91	66852.2
	N-Acetylglutamic acid	190.071	12.6417	0.00094138	0.0231423	-4.45457	16.19	90436.1
		193.974	15.9246	0.00116697	0.0266092	3.46383	8.38	16007.5
		194.081	19.7187	0.00999226	0.101711	-1.39629	7.26	446.245
	Phenylacetylglycine	194.081	5.62662	0.000994583	0.023262	4.71992	9.35	159656
		196.154	2.59035	0.0218788	0.162371	3.48065	35.16	24978.2
	N-Acetylornithine	197.09	10.0801	0.0171412	0.141198	-2.85277	14.77	236640
		198.011	10.3297	0.000882154	0.0227528	3.28133	7.9	128239
		198.097	9.79547	0.0238327	0.17044	1.30437	8.09	49264.6
		200.008	10.3297	0.00100209	0.023262	3.34126	13.46	53932.6
		200.044	10.1939	0.0193454	0.148472	1.99338	18.77	43445.4
	3-Amino-5-morpholinomethyl-2-oxazolidinone	202.119	7.74082	0.0278378	0.180984	1.3616	1.63	94536.9
		203.053	24.0083	0.00712935	0.0869522	-1.77938	8.31	963.242
		203.053	24.3448	0.00825202	0.0914308	-2.2814	13.34	232.194
		203.053	10.1808	0.0121569	0.112511	1.36293	5.18	965813
		204.123	22.965	0.00807165	0.0906937	-2.54214	20.82	156.634
		204.123	21.5906	0.00634061	0.0811048	-5.94641	10.57	393.899
		204.134	8.4292	0.0262155	0.174033	1.52972	5.04	45288
		205.092	16.5394	0.00901309	0.0963827	1.49372	7.26	31803.8
		205.097	22.5909	0.0318463	0.191543	-3.4646	14.82	98.6836
	L-Tryptophan	205.097	8.59562	0.0138116	0.12277	-1.52052	8.75	1.58717e+06
		206.101	8.58685	0.0129197	0.117497	-1.55231	8.91	194165
		208.039	9.36193	0.00280577	0.0499721	2.70609	8.36	3.97227e+06
	Kynurenine	209.092	8.16647	0.00742595	0.0871902	-1.96491	5.52	43337.4
		209.138	1.99862	0.0356786	0.204125	1.43664	1.73	297634
		209.987	10.3297	0.000686495	0.0213913	3.51805	11.08	55465.1
		211.039	8.04385	0.0395585	0.214097	1.98667	8.01	252318
		211.984	10.3122	0.000780078	0.021532	3.49114	7.76	28969.6
		212.1	11.2035	0.0376737	0.208709	-1.55559	12.06	29034
	Acetylarginine	217.13	10.6979	0.00195382	0.0394104	-2.55656	5.89	40210
		218.092	8.58685	0.00587771	0.0758	-1.93893	10.18	86385.2
		218.114	11.7558	0.017008	0.140838	-5.5326	23.5	38462.8
		218.975	14.4883	0.000840974	0.0220522	2.96748	5.41	46369.3
		218.984	12.6417	0.000237593	0.0117958	2.58661	7.26	104161
		219.018	10.1808	9.55135e-06	0.00300507	3.08866	1.78	21399.2
	N-(1-deoxy-1-fructosyl)glycine	220.082	12.6417	0.00512944	0.069964	-2.69834	20.89	132362
		220.118	22.5909	0.04881	0.239235	-8.74555	7.46	19.666
		220.118	21.1921	0.0254968	0.174033	-23.6202	56.94	98.8283
		220.558	10.1852	0.0304709	0.188744	1.74148	9.93	52106.6
		220.935	16.4115	0.000466498	0.017494	2.62535	6.05	339452
	N-Acetyl-D-galactosaminitol	224.113	13.2948	0.00473306	0.0676971	-3.15892	5.4	856292
		225.055	6.34277	0.0175421	0.14284	1.9483	1.54	129069
		225.116	13.3036	0.00397072	0.0641595	-3.35616	6.02	73821.2
		226.05	11.2472	6.33508e-05	0.00830861	3.59449	6.98	127997
		226.165	2.003	0.032728	0.195046	1.43324	4.06	193533
		232.154	21.5511	0.0351582	0.201882	-3.1353	21.01	196.765
		234.077	24.0083	0.00650773	0.0819106	-1.46216	4.05	7154.71
		234.077	24.3217	0.016922	0.140838	-1.33431	7.21	6508.19
		234.077	22.6172	0.0117574	0.112013	-2.45429	11.83	7054.31
		234.077	23.0984	0.00850793	0.0918869	-1.68273	10.23	5093.04
		234.077	22.2975	0.0176585	0.14284	-2.2727	13	175090
		234.077	10.137	0.0455638	0.229766	1.26977	7.49	1.0747e+06
		235.08	11.3698	0.0173928	0.142524	1.51406	12.63	82809
		235.08	10.1414	0.0423335	0.222037	1.28508	8.04	90808.3
		235.165	21.4592	0.0230514	0.166365	-1.4069	11.14	310.312
		236.073	10.1414	0.0493265	0.239919	1.25325	6.5	49331.3
		240.181	2.38453	0.0455014	0.229766	2.65639	14.25	142322
		241.05	8.8277	0.0492795	0.239919	1.81227	5.81	41365.7
		242.925	30.2278	0.0178868	0.142852	2.00807	21.24	121.567
		243.065	8.92842	0.000638074	0.0204878	1.7853	0.73	31049.1
	2-Fluoro-6-(4-methoxyphenoxy)benzonitrile	244.079	8.03948	0.0283503	0.181319	1.31917	7.83	125739
		246.022	11.1071	0.00013068	0.00977333	3.49873	7.56	118036
	N-Acetyl-D-galactosaminitol	246.095	8.74888	0.00649399	0.0819106	-1.80952	9.84	174655
		246.17	19.7493	0.000710054	0.0213913	-3.69186	11.41	282.456
		246.17	21.1658	0.00844967	0.0918869	-1.88507	4.59	787.14
	N-Acetyl-DL-tryptophan	247.108	6.34277	0.00422826	0.064587	-2.46394	12.03	122503
		249.046	9.79547	0.0255648	0.174033	-3.3418	29.27	225555
		249.046	10.1808	0.0388178	0.212096	-2.63501	28.43	127666
		250.051	11.6638	0.00730782	0.0871034	1.67685	11.63	82423.1
		252.066	8.03948	0.0477223	0.236731	1.91827	10.7	169682
	Muramic acid	252.108	11.4925	0.00232445	0.0452089	-3.16862	6.9	294734
		255.944	9.15612	0.000132741	0.00977333	4.66163	9.41	69971.6
		256.131	19.8292	0.00240149	0.0455222	-4.12117	21.85	5670.61
		256.131	21.2402	0.00279505	0.0499721	-2.82444	8.87	7050.58
		260.001	14.4883	0.00152839	0.0316403	2.71616	4.21	86413.6
	Hexanoylcarnitine	260.186	5.32008	0.0485472	0.23869	-1.5227	4.73	452802
		262.165	7.50435	0.0442341	0.227938	-1.30494	4.73	117011
		262.888	14.4664	0.00282681	0.0499721	-2.63066	13.46	44204.5
		263.085	25.9323	0.023277	0.167226	1.30262	6.89	945.936
		265.023	9.78232	9.28879e-05	0.00830861	2.86074	3.99	578896
		265.023	10.1896	3.84756e-05	0.00830861	3.1879	6.62	436771
		266.186	2.09515	0.0243057	0.173036	-1.49609	8	87949.3
		267.076	11.256	4.20196e-05	0.00830861	3.49237	7.17	81473.9
	N5-(4-Methoxybenzyl)glutamine	267.134	9.31815	0.00511928	0.069964	2.44133	2.46	35569.9
	N-(1-Deoxy-1-fructosyl)serine	268.103	12.6417	0.00478714	0.0678538	-2.88381	22.09	50167.5
		276.144	10.5837	0.00556795	0.0736295	-1.76157	6.69	24909.3
		280.154	5.86832	0.000215602	0.0113187	6.71371	9.59	85078.1
		281.247	1.71837	0.00448746	0.0656355	1.63355	0.51	41234.4
		288.922	16.3764	0.000155579	0.0105392	2.91277	2.71	1.07293e+06
		290.076	9.79547	0.0479981	0.236731	1.65661	20.72	64068.3
		290.076	10.1983	0.00803126	0.0906937	2.85553	7.59	39609.4
		290.16	5.74047	0.0014637	0.0307052	53.5854	6.34	124821
		296.021	10.1939	0.000252961	0.0120604	2.49354	7.13	177189
		296.971	9.18678	0.00138866	0.029929	4.4974	10.44	622784
		296.971	8.4117	0.0344718	0.200524	4.24267	12.95	272771
		298.018	10.1939	8.19107e-05	0.00830861	2.63293	4.41	54225.3
		305.588	10.1983	0.00389125	0.0637733	2.66341	8.01	10202.1
	Cytidine monophosphate	306.05	9.7867	0.000100337	0.00830861	2.83314	3.99	713444
		306.05	10.1896	6.46222e-05	0.00830861	3.12193	6.54	364877
		307.997	10.2421	4.31301e-05	0.00830861	3.04027	6.29	38997.3
		309.049	10.1764	9.60895e-05	0.00830861	3.15514	5.59	103576
		309.049	9.80422	0.000924878	0.0230975	2.44002	11.06	132449
		309.129	26.9318	0.0261157	0.174033	1.42011	7.42	224.341
		309.129	27.0993	0.0332307	0.197041	1.50758	13.83	265.155
		309.129	11.7251	0.00439074	0.0656355	-5.77109	14.15	1.13159e+06
		309.129	11.5625	0.00454721	0.0656355	-3.49844	23.61	861837
		309.129	12.668	0.012302	0.113188	-2.32095	18.46	321471
		309.995	10.2421	7.4333e-05	0.00830861	3.06925	6.97	24396.5
		310.057	6.34277	0.0474951	0.236731	1.22341	4.36	146024
		310.132	11.7295	0.00453508	0.0656355	-6.2037	13.01	161501
		312.953	10.2377	0.0303976	0.188744	-1.28308	5.38	18906.5
	9-Decenoylcarnitine	314.233	3.13375	0.019039	0.147569	-1.59	7.94	184896
	Decanoylcarnitine	316.248	3.02428	0.0190637	0.147569	-1.60386	6.87	128888
		331.092	11.2472	0.00076319	0.021442	2.66276	5.49	168309
		331.111	11.5757	0.00128948	0.0281774	-6.35159	21.51	709074
		343.997	8.04385	0.0341858	0.199947	2.5197	13.04	95898.5
		345.206	2.13018	0.0346696	0.200524	3.0101	19.94	64530.8
		351.199	11.8	0.016391	0.137906	-4.20333	31.23	63398.6
		353.023	6.07957	0.0223617	0.162882	5.83927	11.58	130821
		356.909	16.2224	0.00228753	0.0452089	3.95648	8.56	62129.4
	3-Beta-Hydroxy 5-cholenoic acid	357.279	2.4108	0.0359444	0.204161	-9.01234	12.12	170273
		367.15	10.2071	0.00983712	0.101157	-3.09529	10.6	57654.6
		385.023	8.05262	0.0301148	0.18862	2.52131	15.57	92388
		389.043	6.34277	0.0160104	0.136161	2.71028	3.66	118567
		395.025	11.0983	0.0115424	0.111411	3.07443	12.66	70269.1
	O-Palmitoleoeoylcarnitine	398.326	2.80492	0.0314856	0.191264	-1.79056	3.07	411581
		399.081	10.1896	0.000136661	0.00977333	2.97377	4.28	81030.4
		400.236	17.0344	0.0154415	0.133487	-47.8724	89.27	175.461
		402.358	2.91877	0.0400302	0.215688	1.90193	16.49	48283.4
		413.998	11.1071	0.000521066	0.018063	2.71836	1.97	99034.3
		418.054	10.1764	2.21381e-06	0.000869267	5.35383	4.75	108739
		424.897	16.2575	9.18602e-05	0.00830861	3.73977	5.3	521237
		432.224	1.84535	0.049729	0.2402	-1.68875	19.42	17558
		432.238	15.8765	0.0473785	0.236731	1.71554	19.07	3425.32
		435.058	10.1939	0.00125169	0.0280693	2.36879	6.04	222122
		437.055	10.1939	0.00144207	0.0306602	2.55162	5.64	69784.1
		445.087	10.1896	0.000167466	0.0105392	2.54222	0.28	169545
		445.087	9.80422	0.000734194	0.0213913	2.33353	9.46	202871
	LysoPE(16:0/0:0)	454.293	3.18678	0.0290345	0.183457	1.45171	5.58	1.92193e+06
		456.107	11.221	0.00411872	0.0641595	1.48838	6.42	67679.4
		460.269	1.7534	0.0177126	0.14284	2.00279	18.97	3.38356e+06
		462.267	5.7803	0.0307685	0.189552	-117.819	16.33	735045
		477.162	11.2647	0.00409162	0.0641595	2.07874	8.16	240953
	Taurocholic acid	480.278	5.67478	0.0337797	0.198309	-66.907	13.47	4.24943e+06
		494.324	2.88373	0.0494071	0.239919	-1.22094	6.44	3.77719e+06
		496.273	2.91438	0.0100203	0.101711	-6.27037e+06	11.64	768638
		496.421	1.73588	0.0318903	0.191543	-1.20801	3.89	90960.1
	Taurodeoxycholic acid	500.304	3.46705	0.0156566	0.133876	-67.9795	9.18	1.53385e+07
	LysoPE (20:4/0:0)	502.293	2.94505	0.0111192	0.108605	1.49541	4.34	1.43003e+06
	LysoPC(O-18:1/0:0)	508.376	2.86183	0.0184335	0.14501	1.84631	3.2	173835
	Taurocholic acid	516.299	5.81097	0.0347501	0.200524	-59.1276	12.75	1.28814e+07
	Taurocholic acid	516.299	5.2938	0.0323426	0.193482	-124.123	12.53	1.02416e+07
		518.305	5.81097	0.0367932	0.20712	-107.028	16.55	346920
	LysoPC(18:1)	522.346	2.87498	0.0104047	0.103608	-3.51368	4.49	191992
	LysoPE(20:4/0:0)	524.275	2.96693	0.00367509	0.0608646	1.66882	7.36	153161
	LysoPE(20:3/0:0)	526.293	2.92315	0.0281468	0.181319	1.58314	14.74	3.34612e+06
		531.31	2.91002	0.0191339	0.147569	-9598.94	77.59	337047
		531.31	19.1694	0.000164295	0.0105392	4.13656	3.93	37361
		531.31	4.7669	0.0264615	0.174195	-120.414	9.59	858645
		531.31	3.80977	0.0221629	0.162882	-112.515	3.3	2.51898e+06
		533.326	5.81097	0.0312457	0.191264	-104.894	14.49	3.22575e+07
		533.326	5.2938	0.0347943	0.200524	-125.57	11.24	9.32847e+06
		535.331	5.81097	0.0271801	0.178181	-162.789	15.08	1.28347e+06
	PC(19:0/0:0)	538.387	2.72172	0.00293691	0.0513416	-2.18777	4.39	789147
		548.275	2.92753	0.00417928	0.0644648	2.12136	11.78	156414
		552.403	2.67355	0.0337445	0.198309	-1.70887	3.03	669659
		554.319	2.60787	0.042809	0.223022	-13.7141	13.57	172372
		575.142	11.747	0.0419686	0.222037	-3.11682	23.02	136940
		575.467	1.7096	0.010748	0.105688	-1.51608	5.65	74650.1
		576.332	1.68772	0.0256641	0.174033	2.30185	21.85	155257
		584.473	1.73588	0.0424787	0.222037	-1.22808	3.87	64900.7
	PC(16:0/5:0(CHO))	594.377	2.39767	0.0291527	0.183468	-1.89022	20.74	157722
		599.34	8.27157	0.0120319	0.112013	-3.40795	11.85	5.81233e+06
		600.468	1.73588	0.0372488	0.20712	-1.79114	16.45	74731.2
		601.346	8.27157	0.0127581	0.116702	-3.86489	13.98	274446
		621.322	8.14457	0.00769167	0.0883325	-8.22675	14.56	612194
	PC(16:0/9:0(CHO))	650.439	2.20902	0.0263962	0.174195	-1.67818	16.74	612842
		675.544	2.48525	0.0395619	0.214097	-1.85785	3.24	345180
	PS(P-16:0/13:0)	678.471	2.16083	0.0446966	0.228883	-1.86796	16.77	287422
		689.559	2.41957	0.0451613	0.229766	-2.20853	6.2	826867
		726.53	1.63953	0.0358308	0.204161	2.04766	6.46	757435
		758.221	16.994	0.0423651	0.222037	-1.55516	17.64	14996.9
		761.393	8.96345	0.00557101	0.0736295	-12.0677	20.24	440765
		773.078	11.0983	0.0431916	0.223535	-2.21309	26.51	140968
	PC(16:0/18:2(11Z,13Z))	780.553	1.98987	0.0119448	0.112013	-1.31172	2.89	8.10215e+06
		800.617	1.94607	0.0387853	0.212096	-4.20201	9.29	434972
		832.24	1.63953	0.0479376	0.236731	1.36236	5.24	2.69887e+06
		1021.63	2.91002	0.0369564	0.20712	1.97117	19.45	203860
		1029.69	2.83557	0.0367619	0.20712	-1.35496	5.44	145463
	Supplementary Table 2: HILIC-NEG
	Putative identification	Mass to charge ratio (m/z)	Retention time (min)	ANOVA nominal Pvalue	Storey method pFDR q-value	Fold change (relative to KO)	Coefficient of Variance (% min CV)	Maximum Abundance
		79.957	2.68835	0.0160623	0.234964	8.88289	59.04	2463.25
		79.9571	2.36833	0.000154105	0.0223819	1480.03	17.26	2200.07
		79.9571	6.00227	0.0159423	0.234899	4.07329	14.34	6818.75
		87.0086	6.04203	0.00376023	0.139015	-4.73177	14.87	8915.8
		88.988	20.771	0.0388236	0.323415	17.2295	67.72	1307.88
		93.0343	2.64893	0.00663531	0.170782	6.99254	46.09	28199.8
	Sulfate	96.9599	14.4442	0.0166415	0.237611	-1.27223	3.67	978172
		97.0042	8.81545	0.00338988	0.136206	1.51144	6.79	2449.91
		97.0293	9.8127	0.0393375	0.323415	1.30723	10.24	3302.17
		98.9557	14.4485	0.0118799	0.215676	-1.277	3.25	44198.9
		106.041	13.7186	0.0373824	0.323415	-1.45574	6.33	60.8436
		106.041	4.48677	0.0213902	0.262467	-8.19444	66.62	4248.29
		106.041	2.52598	0.0285385	0.299781	-10.9351	59.48	5352.86
		106.041	26.2068	0.0459809	0.346377	-1.80412	10.13	18553
		106.041	29.3988	0.00836048	0.191209	-1.47021	9.21	20337.9
		107.036	27.2757	0.0115268	0.214389	1.44733	1.8	961.945
		107.036	28.1162	0.0491798	0.349708	-2.30626	26.76	2373.66
	4-Methylphenol	107.05	2.36833	0.000424212	0.0453981	259.404	15.19	18271.9
	Imidazole acetaldehyde	109.041	26.2068	0.0481098	0.346891	-1.56674	10.83	1181.3
	2-Furoic acid	111.009	14.2989	0.0156719	0.234899	1.23774	5.95	40046.9
		114.031	8.81545	0.00530847	0.163544	1.44181	6.87	7716.58
	3-Hydroxyvaleric acid	117.056	4.70248	0.00246706	0.124105	1.53762	6.51	211849
		117.071	2.53037	0.00195839	0.12072	5.01356	17.47	40860.9
		119.035	8.56483	0.0362733	0.323415	1.39285	12.18	22090.4
	4-Hydroxybenzaldehyde	121.029	3.70575	0.0092774	0.198678	1.34888	7.58	29048
	2-Hydroxyethanesulfonate	124.991	9.03877	0.00279851	0.124446	-1.40495	2.82	50500.5
	4-Hydroxy-6-methyl-2-pyrone	125.024	4.53532	0.040409	0.323415	-2.56343	24.12	38793.7
	N-Acetylalanine	130.051	7.70163	0.0223423	0.267231	1.47483	3.55	40749.9
	Isoleucine	130.087	7.82425	0.00374391	0.139015	1.36874	2.05	199139
	DL-beta-leucine	130.087	8.11763	0.00409416	0.146049	1.34031	5.44	105412
		131.035	12.3786	0.0464287	0.346377	1.28343	7.57	1306.8
		131.046	9.76892	0.0406383	0.323415	1.70673	4.18	14584.6
		131.09	7.82425	0.00281534	0.124446	1.40891	2.32	12898.5
	D-aspartic acid	132.03	12.1587	0.0177624	0.237611	1.87436	8.01	46596.2
	L-aspartic acid	132.03	20.5441	0.0464123	0.346377	3.80461	22.92	193.742
		132.045	6.00227	0.0199401	0.256324	4.35417	13.91	7942.8
		133.05	7.71915	0.0106112	0.201646	2.23842	4.01	5884.44
		134.895	18.8303	0.0083693	0.191209	1.22929	0.46	1136.54
		141.039	9.44358	0.0326676	0.310393	3.86179	21.62	9538.99
		144.002	9.45672	0.0296683	0.303463	1.8711	13.16	7498.12
		144.066	14.3339	0.0388311	0.323415	-1.26545	8.67	139.471
		144.869	10.2075	0.0304347	0.30788	-1.66595	7.26	21229.8
	3-Methylglutaric acid	145.05	6.02013	0.000201704	0.0273421	-3.31551	9.46	111699
		145.098	17.7387	0.0169532	0.237611	1.38439	7.88	260158
		146.025	2.21945	0.0442477	0.342093	2.41249	28.39	28266.9
	L-4-Hydroxyglutamate	146.046	9.24973	0.0486802	0.349708	1.35114	7.13	6639.59
		146.046	20.2602	0.0100174	0.198678	1.274	3.32	384.754
		146.082	8.71418	0.0349197	0.321744	1.29772	5.99	11030.2
		146.101	17.7387	0.0159302	0.234899	1.39755	7.66	17398.4
		146.867	10.2031	0.0403092	0.323415	-1.66111	11.17	21535.5
		147.066	6.134	0.0490617	0.349708	1.34844	11.08	17375.9
	D-(-)-Lyxose	149.045	7.19927	0.0429308	0.334454	-1.27248	3.8	9666.58
	D-(-)-Lyxose	149.045	10.0889	0.0392205	0.323415	1.44747	10.68	57830.5
		151.04	5.63767	0.0315249	0.308561	2.90285	24.49	16893.1
	Orotic acid	155.01	8.85923	0.0102663	0.198678	1.73126	11.98	6752.39
		155.071	2.60515	0.0254346	0.285044	-2.23218	23.23	10067.2
		157.036	8.81545	0.0102353	0.198678	1.40966	8.47	241852
		157.087	2.50847	0.0193641	0.252396	-1.69322	10	45062.5
		157.901	5.18947	0.0361387	0.323415	-2.1823	20.88	11951.2
		158.04	8.8023	0.0034833	0.136206	1.46871	7.24	11241.1
		159.041	10.4222	0.0316511	0.308561	-1.38967	11.02	6251.23
	Daminozide	159.077	9.82585	0.0363455	0.323415	3.53246	20.94	11779.3
		161.045	9.80395	0.0250084	0.284535	1.28296	8.22	2.7236e+06
		161.045	18.1422	0.0276276	0.294116	1.282	4.13	94882.3
	3-(4-Hydroxyphenyl)propionic acid	165.055	3.72327	0.0117328	0.214925	-2.55889	23.76	158360
	Noradrenochrome o-semiquinone	166.051	3.37295	0.0469703	0.346527	1.30663	6.92	25154.9
	Uric acid	167.021	10.6109	0.0368908	0.323415	-1.51212	14.86	600404
		167.021	18.9424	0.0339869	0.315555	-1.33038	9.57	2234.94
		172.83	10.1681	0.0405999	0.323415	-1.26016	9.18	8798
	4-Phenolsulfonic acid	172.991	2.67522	0.00756964	0.183233	6.71509	47.51	6.3306e+06
	cis-Aconitic acid	173.009	12.5419	0.00693353	0.176227	1.32922	6.14	6712.99
		174.956	8.34973	0.0444499	0.342354	-1.46713	7.94	154509
		174.987	2.66645	0.00753213	0.183233	6.84522	47.38	277848
		174.997	2.6796	0.00992799	0.198678	10.6444	27.25	4749.21
	Ascorbate	175.025	13.7985	0.00948905	0.198678	3.86458	30.93	15129.7
	N-Formylmethionine	176.038	6.46322	0.0146495	0.234546	1.59271	2.13	13343.1
		179.056	18.1159	0.0259823	0.287186	1.33536	3.79	13274.4
	2,4-Dinitrophenol	183.004	2.36397	0.0204053	0.257015	-1.56576	4.63	7204.54
		183.102	2.39462	0.0120308	0.216483	-1.68526	10.09	10857.1
		185.043	4.65393	0.00551675	0.165665	2.43556	8.51	49089.4
		187.007	2.35958	3.47803e-05	0.007076	97.7069	15.65	4.7617e+06
		188.01	2.35958	4.28835e-05	0.00793	114.644	15.39	355504
	DL-alpha-Aminosuberic acid	188.093	6.98235	0.0407184	0.323415	1.34917	8.92	9807.05
		189.003	2.36397	3.19927e-05	0.007076	120.391	15.32	210001
		189.013	2.3552	6.6237e-05	0.0112172	1825.69	12.02	7529.05
	Phenylacetylglycine	192.066	5.66395	0.00256348	0.124105	6.912	23.62	353635
		193.07	5.65957	0.00401596	0.145817	10.171	23.66	40710
		194.927	14.4442	0.0141758	0.232453	-1.29161	1.47	2.31767e+06
	Gluconic acid	195.051	7.20803	0.0251884	0.284535	-1.33446	7.77	12206.6
	Gluconic acid	195.051	11.6722	0.0352651	0.321744	1.28659	5.87	399076
		195.139	1.89463	0.0447556	0.343407	-1.4727	10.62	20734.1
		196.022	8.99498	0.00344523	0.136206	1.37471	3.56	6852.47
		196.923	14.4442	0.0136491	0.227549	-1.30241	1.6	197664
		198.075	7.77608	0.00554029	0.165665	1.31143	5.3	21240.2
		199.019	10.3345	0.0476503	0.346891	1.38219	13.28	45958.7
	N-Acetyl-aminooctanoic acid	200.129	2.67083	0.00896715	0.198187	-1.79548	12.55	31523.7
		201.022	2.08768	9.38626e-05	0.0146869	2592.62	53.36	1.84869e+06
		203.056	11.2863	0.0479482	0.346891	-2.91259	14.73	30552
		203.056	10.1944	0.00586532	0.166935	-2.87624	19.72	3394.05
	D-(+)-Tryptophan	203.082	8.57797	0.0221136	0.266061	-1.36111	7.86	423451
	Indole-3-lactic acid	204.066	6.81465	0.00577728	0.166935	-1.97891	11.44	58188.1
		204.086	8.57797	0.018848	0.247253	-1.37959	7.06	50340
		204.981	2.17128	0.0460785	0.346377	-4.96861	53.04	12781.2
		207.051	10.4791	0.025129	0.284535	1.30088	8.14	1.15807e+06
		207.051	18.8259	0.0303144	0.30788	1.26023	4.03	38913.4
		207.051	18.2481	0.0369416	0.323415	1.24794	3.54	20293.6
		209.085	1.8596	0.0176251	0.237611	-1.54489	13.01	4677.24
		209.969	9.04753	0.000528104	0.0511339	-1.7203	3.8	16618.9
		211.134	2.18005	0.0273175	0.292346	-1.53219	14.96	17826.2
	3-Indoxyl sulphate	212.002	6.02013	0.0172553	0.237611	4.06616	13.98	9.73767e+06
		213.005	6.0154	0.0174337	0.237611	4.18381	14.06	986358
		213.085	17.7475	0.0261074	0.287186	1.21329	4.15	34525.4
		213.149	2.10998	0.01006	0.198678	-1.98444	4.98	110731
		213.998	6.01103	0.0180473	0.239844	4.17742	14.64	476836
		214.008	5.98475	0.0382879	0.323415	3.73853	14.1	8165.7
		214.049	10.4572	0.0402759	0.323415	-1.70333	6.12	8300.66
	12-Hydroxydodecanoic acid	215.165	2.08768	0.0152403	0.234899	-1.64226	11.4	52815
		217.017	2.08768	0.000778331	0.0608695	25.9925	42.13	7534.26
		217.017	4.65393	0.0200437	0.256324	2.42331	29.88	53338.1
		217.03	18.6526	0.0492785	0.349708	1.35342	10.47	288.222
		218.982	8.06072	0.045509	0.345528	-1.59923	9.24	36449.8
		224.763	9.97473	0.0175578	0.237611	-1.20244	5.04	6846.34
		225.024	8.81545	0.00634696	0.166935	1.53829	5.86	9682.11
		225.061	20.3183	0.0242131	0.279734	1.3604	6.66	3093.49
		225.061	18.1203	0.0207857	0.25929	1.35648	2.33	7167.48
		226.145	2.60077	0.0296996	0.303463	-1.56302	6.55	13774.1
	2'-Deoxyuridine	227.067	4.77295	0.0176972	0.237611	1.96656	11.75	352475
		227.165	2.07017	0.0286837	0.299781	-1.99145	23.2	17273.7
		227.201	1.7983	0.00471514	0.159791	-1.98365	13.87	94235.8
		228.07	4.71123	0.00344042	0.136206	2.12359	14.64	43276.2
		228.16	2.5873	0.0137648	0.227549	-1.54637	3.74	5698.61
		229.002	10.4616	0.00489203	0.160437	-2.368	8.83	8451.66
		229.181	2.05265	0.0377154	0.323415	-1.56117	14.88	15740.4
		229.861	5.16758	0.0151829	0.234899	1.90711	18.25	106450
	2,4-Dihydroxyacetophenone 5-sulfate	230.997	2.57853	0.000231648	0.0294386	-6.81596	6.47	19482.6
		237.149	2.07455	0.0128737	0.224062	-1.77325	9.51	21691.2
	Indole-3-carboxilic acid-O-sulphate	239.997	2.72338	0.000486611	0.0494721	-318.47	29.91	47047.6
		241.092	18.1956	0.0480749	0.346891	1.34492	8.59	40828.3
		242.013	2.59167	0.000295303	0.0333583	-23.1126	28.06	62926.2
		242.052	18.4254	0.014375	0.233833	1.22415	3.06	744.148
	Pseudouridine	243.062	8.15267	0.000698575	0.0568174	1.34473	3.18	120672
		243.196	1.9253	0.0096207	0.198678	-1.94284	7.16	47625.5
		245.077	6.35812	0.0101549	0.198678	1.64373	4.27	13584.7
	N-Acetyl-DL-tryptophan	245.093	6.24785	0.00518767	0.162281	-2.74789	6.18	72281.3
		249.032	2.53475	0.00360702	0.138383	-39.0426	25.84	21570.9
		249.088	6.04203	0.0026431	0.124446	-4.59242	25.85	46537.9
		249.116	1.83772	0.0392823	0.323415	-3.25558	44.67	24779.1
		250.124	1.98258	0.00635036	0.166935	-10.4267	43.69	42446
		251.128	6.55992	0.0354445	0.321744	-1.45341	9.54	42760.3
		252.948	2.67083	0.0315234	0.308561	647.842	86.09	14742.2
		253.092	6.47197	0.00025462	0.0304546	-1.59364	2.65	10783.7
		253.093	5.25078	0.00186745	0.12072	-1.35153	2.22	189075
		253.144	2.272	0.033615	0.313534	-1.47307	8.34	62281.3
	Palmitoleic acid	253.217	1.78078	0.00784403	0.186899	-2.38482	17.43	741023
	Ascorbic acid-2-sulfate	254.981	15.6392	0.0255138	0.285044	-1.92423	22.01	719.975
		254.994	2.36833	0.0024823	0.124105	1817.6	36.81	15537.2
		255.233	1.76765	0.00727132	0.182531	-1.45151	8.38	2.02917e+06
		259.13	9.79082	0.0151234	0.234899	2.16779	13.46	8089.72
		259.839	14.4879	0.0465054	0.346377	-1.59054	6.57	19834
		261.098	2.47343	0.000560708	0.051823	-13.1732	11.6	144145
		263.044	4.92183	0.0195095	0.25267	2.71679	15.15	77241.6
		263.058	9.34235	0.0153756	0.234899	1.68879	6.82	43475.2
		265.073	9.34672	0.0376419	0.323415	1.54345	14.84	13028.1
		265.181	1.89027	0.0320195	0.308561	-1.55185	8.45	13754.6
		267.105	1.83772	0.00195922	0.12072	-14.8879	37.66	66043.8
		267.196	1.8596	0.00245265	0.124105	-1.76701	4.43	44613.8
		269.087	7.89868	0.0062716	0.166935	2.09514	14.35	26963
		269.212	1.86837	0.00207945	0.124105	-1.89708	6.75	131812
	16-Hydroxyhexadecanoic acid	271.228	1.8596	0.00638377	0.166935	-1.87737	4.28	315917
		273.073	4.75942	0.00480614	0.160205	1.91971	13.4	791871
		274.076	4.77295	0.00457099	0.157531	2.07053	15.07	89217.1
	Norophthalmic acid	274.104	12.4223	0.0316864	0.308561	1.34235	4.43	89197.1
		275.108	12.4267	0.0204769	0.257015	1.39559	4.66	9833.11
		278.916	2.00887	0.0261292	0.287186	-1.32721	2.64	31290.5
	13-Hydroxyabscisic acid	279.123	1.88588	0.00499157	0.161104	1.8658	12.56	68914.3
		279.163	1.71072	0.0422272	0.331514	1.96865	11.25	76345.7
	Linoleic acid	279.233	1.76765	0.0398877	0.323415	-1.61359	18.12	4.41017e+06
		279.989	5.99352	0.0234364	0.273873	2.79761	11.83	38562.2
	p-Cresol glucuronide	283.082	7.3849	0.000687204	0.0568174	200.461	31.44	153067
		283.227	1.84647	0.0424363	0.331873	-1.75683	21.21	10406
		285.243	1.86398	0.0136093	0.227549	-1.49099	1.96	5656.26
		290.063	4.9087	0.0136557	0.227549	2.24451	10.56	92316.1
		291.083	6.35373	0.00604217	0.166935	1.67817	1.14	17667.4
		292.69	9.95283	0.00640373	0.166935	-1.33531	6.69	27701.2
		292.945	14.3033	0.00631959	0.166935	1.25966	2.21	94176
	13-OxoODE	293.212	1.82895	0.0175514	0.237611	-1.61639	13.46	52971.2
		299.222	1.8202	0.0163628	0.237611	-2.16736	16.67	34792.7
		301.238	1.7764	0.00830023	0.191209	-1.58533	10.38	102994
		302.682	9.94408	0.0324241	0.310393	-1.3283	10.37	109091
		303.127	2.60077	0.013003	0.224062	1.95192	13.59	10019
		304.68	9.9397	0.0413912	0.327479	-1.32037	11.22	159641
		305.142	2.57853	0.00256091	0.124105	3.01174	17.05	103471
		306.678	9.9397	0.0389146	0.323415	-1.32747	11.22	117831
		307.158	1.8202	0.0159198	0.234899	-6.1266	39.15	20371.3
		307.194	1.67992	0.0353536	0.321744	2.14061	22.76	95479.7
		308.098	8.98623	0.00973003	0.198678	2.84116	23.42	19006.4
		308.676	9.94408	0.0309612	0.308561	-1.30039	8.7	46846.2
		310.114	9.76892	0.000674655	0.0568174	3.12708	7.67	8799.29
		311.109	9.77768	0.0326121	0.310393	1.70619	2.77	162476
		311.186	1.8815	0.0362953	0.323415	-2.09399	22.75	11739.5
	12,13-DiHOME	313.238	1.89027	0.00756651	0.183233	-2.10939	16.22	157192
		315.253	1.88588	0.0229551	0.271368	-1.79021	12.89	31962.8
		323.189	1.69758	0.0228369	0.271368	2.20943	17.83	27358.9
		323.222	1.80268	0.0158506	0.234899	5.28885	40.79	7962.09
		325.238	1.76765	0.0103573	0.198678	-1.79039	15.39	76874.7
		327.253	1.75013	0.0319274	0.308561	-1.54833	11.26	201775
		329.175	1.89463	0.0295532	0.303463	-2.28272	26.14	16769
		332.109	8.18332	0.0170067	0.237611	-1.23072	2.46	12516.1
		336.052	10.6065	0.0479068	0.346891	-1.93758	23.55	14842.3
		344.134	7.85052	0.00848299	0.191653	2.03381	11.41	20462.6
		345.243	1.8202	0.0406336	0.323415	-1.53746	17.41	58479.8
		346.077	7.40242	0.00127682	0.0927214	5602.64	48.06	29900.2
		346.989	2.64457	0.0214276	0.262467	34.2469	22.49	105405
		349.038	1.85523	0.0027354	0.124446	-11.819	31.05	15768.1
		351.054	2.21945	0.0383597	0.323415	1.59442	17.45	18452.9
		351.22	1.67992	0.0247401	0.284208	2.33015	24.49	49746.1
		351.828	1.75452	0.00139911	0.0951195	-13.4028	28.07	69520.7
		353.826	1.74575	0.00342557	0.136206	-5.42015	24.83	90660
		355.824	1.74575	0.00433507	0.151976	-14.6483	33.45	67143.7
		360.148	2.5873	0.0287494	0.299781	-1.97204	20.64	17210.8
	Adhumulone	361.202	1.62737	0.0374484	0.323415	-3.79531	39.05	23937.6
		367.215	1.70197	0.023607	0.274291	2.23869	24.6	16884.7
		377.069	2.0833	0.0079049	0.186899	4.43428	14.36	31326.3
		379.176	2.13187	0.0387253	0.323415	-1.82306	22.98	38315.2
	12-Ketodeoxycholic acid	389.269	2.12312	0.0146401	0.234546	-10.5894	46.62	51439.4
	Deoxycholic acid	391.285	2.39462	0.0265208	0.289923	-6.56991	51.95	1.27156e+06
		392.047	2.64018	0.0171605	0.237611	29.1677	7.98	188549
		395.247	1.67992	0.0203994	0.257015	2.7878	25.18	40070.2
		401.075	10.1199	0.0183815	0.242699	1.58045	19.01	16587.4
	Indoxyl sulfate	425.011	5.96285	0.00960207	0.198678	45.9841	21.99	274860
	Cysteineglutathione disulfide	425.08	13.9976	0.0493604	0.349708	1.99684	15.91	65041
		431.736	1.69758	0.0268713	0.290629	-587.749	159.22	30904.4
		433.734	1.70197	0.0473063	0.346891	-337.781	126.66	28246.7
		434.236	1.83772	0.0129703	0.224062	-1.71398	7.56	177755
		435.274	2.17128	0.0393258	0.323415	-13.5603	47.15	49631.2
		439.273	1.6932	0.0317439	0.308561	3.40307	29.06	26724.7
	LysoPE(16:0/0:0)	452.278	4.57473	0.0290998	0.301885	1.41803	11.95	100416
	Glycerophospho-N-palmitoyl ethanolamine	452.278	2.81535	0.0467793	0.346527	1.38353	7.84	286564
		458.188	18.0931	0.043873	0.34049	7.88489	64.04	8.51651
		470.069	5.94097	0.0129863	0.224062	35.1084	5.49	505029
		473.268	2.30703	0.00511866	0.162281	-15.8256	40.14	45095.6
		496.273	2.69712	0.0306037	0.308057	-88.7313	106.83	1.2733e+06
	Taurochenodeoxycholic acid	498.289	2.77593	0.0268308	0.290629	-49.1351	99.74	9.99667e+06
		498.929	1.56607	0.00949287	0.198678	-1.53325	10.29	509014
		510.252	2.719	0.0219585	0.265768	-424.578	103.69	152917
		512.268	2.7628	0.033439	0.313534	-134.321	78.69	60505.9
		512.959	1.60985	0.0133484	0.227549	-1.74858	11.9	3.3964e+06
	Taurohyocholate	514.283	4.52218	0.0272867	0.292346	-167.72	31.35	40151.1
		514.283	5.58475	0.0281968	0.298612	-83.8225	63.43	3.48637e+07
	PE(22:6/0:0)	516.288	4.56597	0.0335377	0.313534	-521.897	87.19	93867.1
		524.277	2.77593	0.0377062	0.323415	1.93468	17.78	608031
	2-[4,6-Bis(2,4-dimethylphenyl)-1,3,5-triazin-2-yl]-5-(octyloxy)phenol	530.278	6.06393	0.0470367	0.346527	-246.435	83.28	119514
		538.314	2.77593	0.0332964	0.313534	-1.35761	5.82	196627
		545.315	2.69712	0.0455417	0.345528	-456.861	126.34	158936
		562.956	1.60985	0.00945979	0.198678	-1.85569	13.07	21189.2
		582.271	4.60577	0.0176205	0.237611	-365.859	79.68	891759
		582.271	5.60702	0.0128976	0.224062	-37.3944	66.63	452355
		597.325	8.22273	0.00601226	0.166935	-3.78099	29.27	1.75495e+06
		604.461	1.71072	0.0023298	0.124105	-12155.2	80.69	33071.4
		613.374	1.84647	0.00289711	0.125336	1.86214	9.09	22177.5
		679.844	18.7633	0.0364715	0.323415	5.46253	46.58	5.83982
		692.108	5.92782	0.0114563	0.214389	20.6904	22.31	402493
		697.469	1.78955	0.0233318	0.273873	1.37729	7.47	1.17256e+06
		759.378	8.95995	0.0115981	0.214389	-9.74134	49.62	105777
		888.562	2.57853	0.0014034	0.0951195	-4.36506	12.41	159152
